# Supplementary material for: Comparison of External and Internal Transanastomotic Pancreatic Duct Stents After Pancreaticoduodenectomy: A Propensity-Weighted Cohort Study
Source: Research Square preprint supplement (doi:10.21203/rs.3.rs-8561088/v1), 2026-01-20
Supplement: Supplementary file 1 [file 2f2f09ddc27f0d9d8cb21859.docx]

**Supplementary Table S1. Covariate balance before and after stabilized IPTW**

| **Covariate** | **Unweighted (Internal)** | **Unweighted (External)** | **SMD (before)** | **IPTW-weighted (Internal)** | **IPTW-weighted (External)** | **SMD (after)** |
| --- | --- | --- | --- | --- | --- | --- |
| Age, years | 54.97 ± 11.14 | 56.61 ± 11.55 | 0.144 | 56.97 ± 9.93 | 56.34 ± 11.82 | 0.058 |
| Tumor diameter (cm) | 3.295 ± 1.561 | 3.411 ± 1.665 | 0.072 | 3.356 ± 1.450 | 3.395 ± 1.647 | 0.025 |
| Pancreatic duct diameter (mm) | 5.13 ± 1.86 | 4.97 ± 2.46 | 0.073 | 5.16 ± 1.83 | 5.02 ± 2.55 | 0.063 |
| Male (1) | 38 (59.4%) | 140 (58.8%) | 0.012 | 59.0% | 59.1% | 0.002 |
| Soft pancreas (1) | 32 (50.0%) | 99 (41.6%) | 0.169 | 45.0% | 43.6% | 0.029 |
| Biliary stent present (1) | 32 (50.0%) | 63 (26.5%) | 0.498 | 33.0% | 32.0% | 0.021 |
| Preop biliary drainage (1) | 18 (28.1%) | 74 (31.1%) | 0.066 | 25.0% | 30.0% | 0.112 |
| Diabetes mellitus (1) | 10 (15.6%) | 47 (19.7%) | 0.108 | 20.0% | 19.0% | 0.025 |
| Pulmonary comorbidity (1) | 4 (6.3%) | 11 (4.6%) | 0.075 | 6.0% | 5.0% | 0.044 |
| Cardiac comorbidity (1) | 12 (18.8%) | 36 (15.1%) | 0.099 | 18.0% | 16.0% | 0.053 |
| Neoadjuvant therapy (1) | 22 (34.4%) | 108 (45.4%) | 0.226 | 45.0% | 43.0% | 0.040 |
| Period ≥2015 (1) | 18 (28.1%) | 94 (39.5%) | 0.243 | 34.9% | 37.0% | 0.044 |

Notes: Continuous variables are shown as mean ± SD. Binary variables are shown as n (%) for unweighted comparisons and as weighted percentages after IPTW. SMD = standardized mean difference; |SMD| < 0.10 indicates adequate balance. Stabilized ATE IPTW weights were well-behaved (mean 1.00; range 0.43–2.43).
